# Supplementary material for: Mussel-inspired immobilization of Au on bare and graphene-wrapped Ni nanoparticles toward highly efficient and easily recyclable catalysts
Source: Royal Society of Chemistry journal article supplement (doi:10.1039/c9ra05736f), 2019-01-01
Supplement: c9ra05736f1.pdf [file c9ra05736f1.pdf]

**[Supplementary Information]**

**Mussel-inspired immobilization of Au on bare and  
graphene-wrapped Ni nanoparticles toward highly  
efficient and easily recyclable catalysts**

Fatima Mahnaz,<sup>†</sup> Mohammad Mostafa-Al-Momin,<sup>‡</sup> Md. Rubel,<sup>‡</sup> Md. Ferdous,<sup>‡</sup> and Md. Shafiul Azam<sup>\*‡</sup>

<sup>‡</sup>Department of Chemical Engineering, Bangladesh University of Engineering and Technology (BUET), Dhaka 1000, Bangladesh

<sup>†</sup>Department of Chemistry, Bangladesh University of Engineering and Technology (BUET), Dhaka 1000, Bangladesh

*\*Corresponding Author:*

*mdshafiulazam@chem.buet.ac.bd (M.S.A.)*

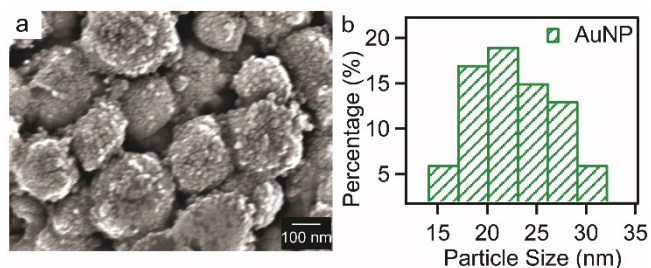

Figure S1. (a) Magnified SEM image of Ni-PD-Au nanocomposite (b) Size distribution of AuNPS on nanocomposite surface using *Image J* software

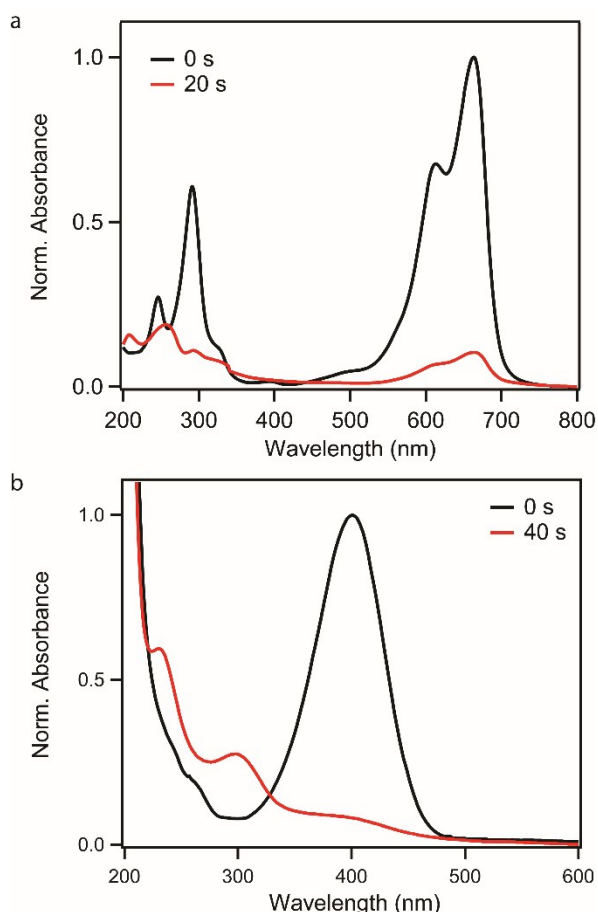

Figure S2. (a) UV absorption spectra of MB reduction and (b) 4-NP reduction in presence of Ni-PD-Au

In reduction reaction of MB and 4-NP by  $\text{NaBH}_4$  in presence of metal catalyst,  $\text{BH}_4^-$  ion get adsorbed on the metal surface that triggers the formation of active hydrogen species and initiates the reduction of the organic dye molecules. In our case, as the reduction of MB and 4-NP in presence of Ni-PD-Au proceeded, the appearance of additional peak at 256 nm (for MB reduction)<sup>1</sup> and 300 nm (for 4-NP reduction)<sup>2</sup> were observed due to formation of LMB and 4-AP respectively.

Table S1. Summary of the Results for the Average Particle Diameter of AuNPs from XRD Measurements of Ni-PD-Au Using Scherrer's Equation

| <b>XRD Reflections at <math>2\theta</math> (<math>^{\circ}</math>)</b> | <b>X-Ray Wavelength, <math>\lambda</math> (nm)</b> | <b>Crystal Shape Factor, K</b> | <b>Line Broadening, <math>\beta</math> (rad)</b> | <b>Particle Diameter, <math>D_p</math> (nm)</b> |
|------------------------------------------------------------------------|----------------------------------------------------|--------------------------------|--------------------------------------------------|-------------------------------------------------|
| 38                                                                     | 0.154                                              | 0.9                            | 0.0061                                           | 23.9                                            |
| 43                                                                     |                                                    |                                | 0.0069                                           | 21.3                                            |
| 63                                                                     |                                                    |                                | 0.0073                                           | 22.3                                            |
| 77.7                                                                   |                                                    |                                | 0.0087                                           | 20.4                                            |
| Average Diameter of AuNPs                                              |                                                    |                                |                                                  | 22.0                                            |

Table S2. Summary of the Results for the Average Particle Diameter of AuNPs from XRD Measurements of Ni-G-PD-Au Using Scherrer's Equation

| <b>XRD Reflections at <math>2\theta</math> (<math>^{\circ}</math>)</b> | <b>X-Ray Wavelength, <math>\lambda</math> (nm)</b> | <b>Crystal Shape Factor, K</b> | <b>Line Broadening, <math>\beta</math> (rad)</b> | <b>Particle Diameter, <math>D_p</math> (nm)</b> |
|------------------------------------------------------------------------|----------------------------------------------------|--------------------------------|--------------------------------------------------|-------------------------------------------------|
| 38                                                                     | 0.154                                              | 0.9                            | 0.0057                                           | 25.5                                            |
| 43                                                                     |                                                    |                                | 0.0061                                           | 24.4                                            |
| 63                                                                     |                                                    |                                | 0.0069                                           | 23.3                                            |
| 77.7                                                                   |                                                    |                                | 0.0078                                           | 22.7                                            |
| Average Diameter of AuNPs                                              |                                                    |                                |                                                  | 23.9                                            |

## References

1. Lee, S.-K.; Mills, A., Novel photochemistry of leuco-Methylene Blue. *Chemical Communications* **2003**, (18), 2366-2367.
2. Aditya, T.; Pal, A.; Pal, T., Nitroarene reduction: a trusted model reaction to test nanoparticle catalysts. *Chemical Communications* **2015**, 51 (46), 9410-9431.
